# Supplementary material for: Plasma-assisted and thermal atomic layer deposition of electrochemically active Li2CO3
Source: Royal Society of Chemistry journal article supplement (doi:10.1039/c7ra07722j), 2017-01-01
Supplement: c7ra07722j1.pdf [file c7ra07722j1.pdf]

Supporting information

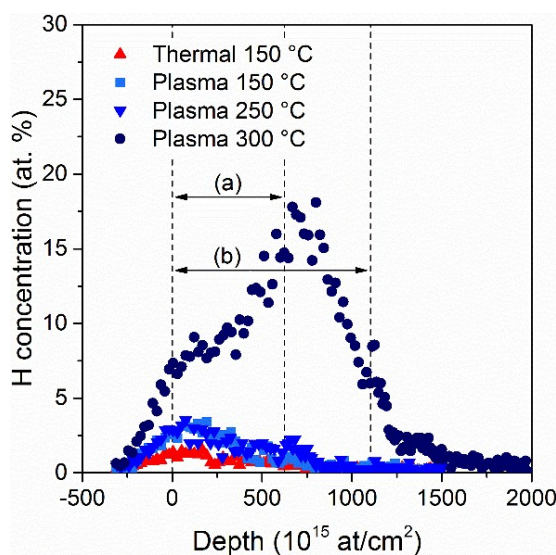

Fig. S 1: Hydrogen concentration as a function of film depth measured by ERD for thermal ALD at 150 °C and plasma ALD at 150, 250 and 300 °C. As deposited, the film thickness was ~ 50 nm. The total number of measured at/cm<sup>2</sup> was similar for the first three samples and is indicated by (a). The thickness of the plasma film deposited at 300 °C increases due to air reactivity. Therefore the thickness of this film prior to the ERD measurement was unclear. The total number of measured atoms for this sample is indicated by (b).

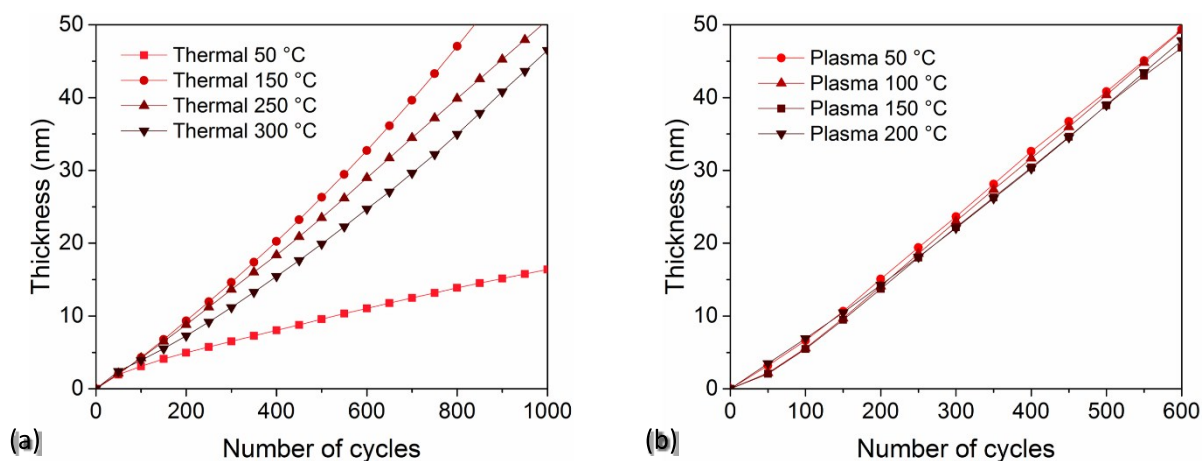

Fig. S 2: (a) In-situ SE thickness measurement for thermal ALD of Li<sub>2</sub>CO<sub>3</sub> at 50, 150, 250 and 300 °C. (b) In-situ SE film growth of Li<sub>2</sub>CO<sub>3</sub> plasma ALD between 50 and 200 °C showing similar growth

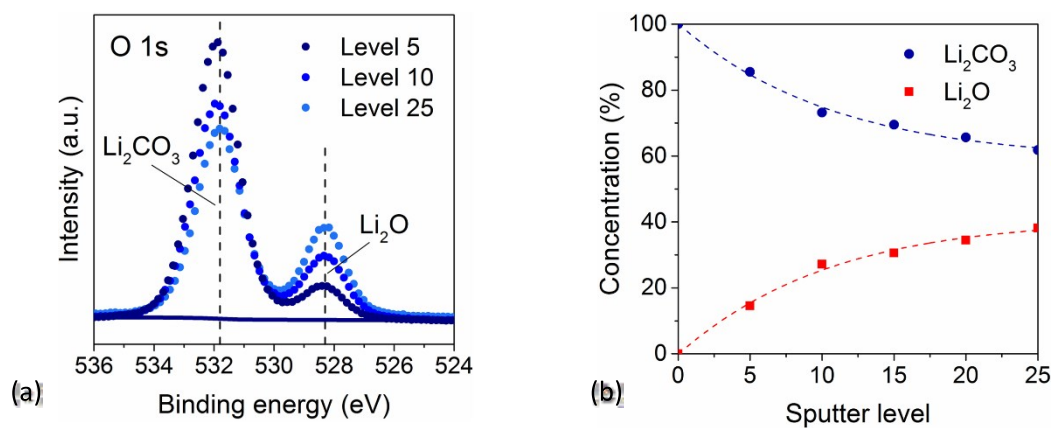

Fig. S 3: (a) XPS O 1s spectrum for an ALD  $\text{Li}_2\text{CO}_3$  film subject to  $\text{Ar}^+$  sputtering. As a result of chemical decomposition, a peak at  $\sim 528.3$  eV appears originating from  $\text{Li}_2\text{O}$ . 25 sputter levels corresponds to removing approximately 30 nm  $\text{Li}_2\text{CO}_3$ . (b) Decrease in amount of  $\text{Li}_2\text{CO}_3$  as a function of sputter level obtained from the XPS fitting.

Table S1: *Ex-situ* XPS stoichiometry results for both plasma and thermal ALD  $\text{Li}_2\text{CO}_3$  films.

| Sample                                  | O (at. %) | Li (at. %) | C (at. %) |
|-----------------------------------------|-----------|------------|-----------|
| Stoichiometric $\text{Li}_2\text{CO}_3$ | 50.0      | 33.3       | 16.7      |
| Plasma 50                               | 47.7      | 33.5       | 18.8      |
| Plasma 150                              | 49.1      | 33.0       | 18.0      |
| Plasma 250                              | 48.0      | 33.7       | 18.4      |
| Thermal 100                             | 48.1      | 33.3       | 18.6      |
| Thermal 150                             | 49.3      | 33.0       | 17.7      |
| Thermal 300                             | 48.5      | 33.8       | 17.7      |

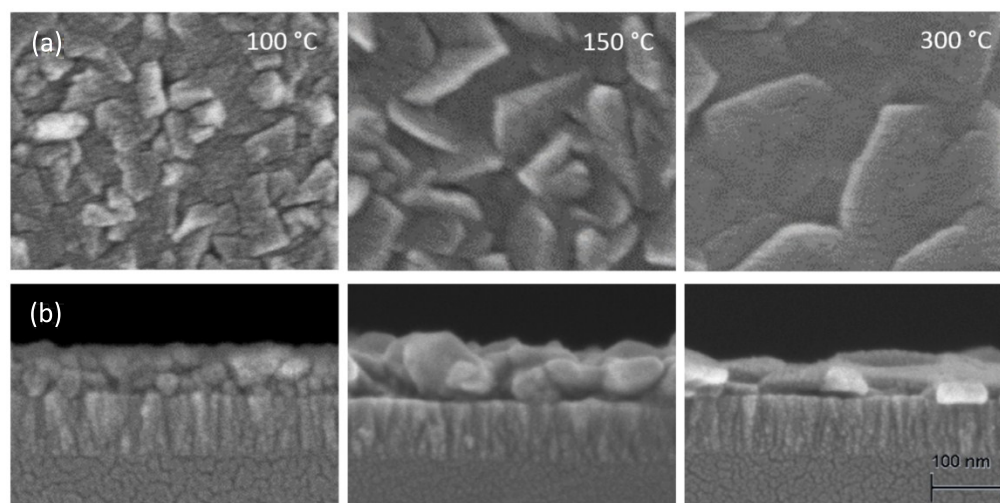

Fig. S 4: (a) High resolution SEM topography and (b) cross-section images of  $\text{Li}_2\text{CO}_3$  deposited with thermal ALD at 100, 150, and 300 °C. The scale bar applies to all of the pictures.
